# Supplementary material for: The first complete inventory of the local glaciers and ice caps on Greenland
Source: Copernicus journal article supplement (doi:10.5194/tc-6-1483-2012), 2012-12-10
Supplement: Supplementary file [file tc-6-1483-2012-supplement.pdf]

# **Supplementary Material**

**of**

**“The first complete inventory of the local glaciers  
and ice caps on Greenland”**

**Authors: P. Rastner, T. Bolch, N. Mölg, H. Machguth, R. Le Bris, and F. Paul**

**P. Rastner et al.: Complete inventory of the local glaciers and ice caps on Greenland**

**Table S1.** Overview of the Landsat scenes used in this study. The numbers in the column “Label” refer to Fig. S1.

| Label | Path | Row | Date       | SLC_off | Label | Path | Row | Date       | SLC_off |
|-------|------|-----|------------|---------|-------|------|-----|------------|---------|
| 0     | 228  | 009 | 2000-08-19 | 0       | 36    | 231  | 014 | 1999-09-07 | 0       |
| 1     | 035  | 003 | 1999-07-24 | 0       | 37    | 005  | 016 | 2000-08-25 | 0       |
| 2     | 033  | 001 | 2000-06-26 | 0       | 38    | 021  | 001 | 2004-01-01 | 1       |
| 3     | 031  | 005 | 2000-06-28 | 0       | 39    | 012  | 002 | 2005-07-23 | 1       |
| 4     | 029  | 006 | 2002-08-23 | 0       | 40    | 012  | 010 | 2002-08-16 | 0       |
| 5     | 018  | 008 | 2001-08-07 | 0       | 41    | 229  | 011 | 2001-07-12 | 0       |
| 6     | 023  | 006 | 2001-08-26 | 0       | 42    | 003  | 017 | 2000-08-27 | 0       |
| 7     | 039  | 001 | 1999-07-20 | 0       | 43    | 019  | 001 | 2004-01-01 | 1       |
| 8     | 039  | 002 | 1999-07-20 | 0       | 44    | 010  | 002 | 2003-07-20 | 1       |
| 9     | 019  | 007 | 2001-08-30 | 0       | 45    | 010  | 011 | 2001-08-15 | 0       |
| 10    | 035  | 004 | 1999-07-24 | 0       | 46    | 227  | 011 | 2000-08-28 | 0       |
| 11    | 026  | 006 | 2000-07-27 | 0       | 47    | 001  | 005 | 2004-07-01 | 1       |
| 12    | 013  | 001 | 2001-07-03 | 0       | 48    | 008  | 003 | 2008-07-01 | 1       |
| 13    | 230  | 007 | 2001-08-20 | 0       | 49    | 008  | 012 | 2001-08-01 | 0       |
| 14    | 230  | 008 | 2001-08-20 | 0       | 50    | 024  | 001 | 2004-01-01 | 1       |
| 15    | 230  | 009 | 2001-08-20 | 0       | 51    | 225  | 011 | 2002-09-05 | 0       |
| 16    | 230  | 010 | 2001-09-21 | 0       | 52    | 015  | 001 | 2003-07-01 | 1       |
| 17    | 004  | 005 | 2003-07-26 | 1       | 53    | 015  | 009 | 2002-08-21 | 0       |
| 18    | 020  | 001 | 2004-01-01 | 1       | 54    | 232  | 006 | 2004-01-01 | 1       |
| 19    | 228  | 012 | 1999-08-11 | 0       | 55    | 006  | 015 | 2009-07-31 | 1       |
| 20    | 002  | 017 | 2001-08-23 | 0       | 56    | 022  | 001 | 2004-01-01 | 1       |
| 21    | 226  | 012 | 2001-08-08 | 0       | 57    | 231  | 011 | 2000-09-09 | 0       |
| 22    | 016  | 001 | 2003-07-01 | 1       | 58    | 232  | 008 | 2001-08-18 | 0       |
| 23    | 233  | 014 | 2002-07-27 | 0       | 59    | 224  | 010 | 2002-09-14 | 0       |
| 24    | 233  | 015 | 2002-07-27 | 0       | 60    | 228  | 010 | 2000-08-19 | 0       |
| 25    | 233  | 016 | 2001-09-10 | 0       | 61    | 009  | 013 | 1994-07-12 | 0       |
| 26    | 233  | 017 | 2002-08-12 | 0       | 62    | 008  | 013 | 2001-08-01 | 0       |
| 27    | 233  | 018 | 2002-08-12 | 0       | 63    | 008  | 014 | 2000-08-14 | 0       |
| 28    | 007  | 003 | 2003-07-01 | 1       | 64    | 045  | 001 | 2000-06-30 | 0       |
| 29    | 007  | 004 | 2003-07-31 | 1       | 65    | 027  | 001 | 2006-06-02 | 1       |
| 30    | 007  | 013 | 2000-08-23 | 0       | 66    | 228  | 010 | 2001-08-06 | 0       |
| 31    | 007  | 014 | 2000-08-23 | 0       | 67    | 012  | 011 | 2001-08-29 | 0       |
| 32    | 023  | 001 | 2004-01-01 | 1       | 68    | 035  | 001 | 2000-06-24 | 0       |
| 33    | 231  | 006 | 2005-09-07 | 1       | 69    | 035  | 005 | 2010-07-06 | 1       |
| 34    | 231  | 012 | 2002-08-14 | 0       | 70    | 227  | 011 | 2000-08-28 | 0       |
| 35    | 231  | 013 | 2000-09-09 | 0       | 71    | 040  | 001 | 2002-07-03 | 0       |
|       |      |     |            |         | 72    | 226  | 010 | 2003-08-14 | 1       |

**Table S2.** Number and area of marine terminating glaciers per sector for all connectivity levels.

|            | Number | Area [km <sup>2</sup> ] |
|------------|--------|-------------------------|
| South-west | 60     | 3162 ± 98               |
| South-east | 236    | 8979 ± 278              |
| East       | 379    | 31 922 ± 990            |
| West       | 18     | 344 ± 11                |
| North-west | 67     | 3316 ± 103              |
| North      | 135    | 16 877 ± 523            |
| North-east | 9      | 372 ± 12                |
| Total      | 904    | 64 972 ± 2014           |

**P. Rastner et al.: Complete inventory of the local glaciers and ice caps on Greenland**

**Table S3.** Absolute numbers for all connectivity levels per sector, the whole of Greenland and the marine terminating glaciers. The  $\pm 3.1\%$  uncertainty is not shown.

|             | North Greenland |                                                             | North-east         |                                                             | East             |                                                            |
|-------------|-----------------|-------------------------------------------------------------|--------------------|-------------------------------------------------------------|------------------|------------------------------------------------------------|
|             | Number          | Area [km <sup>2</sup> ]<br>$\bar{a}$ : 21.1 km <sup>2</sup> | Number             | Area [km <sup>2</sup> ]<br>$\bar{a}$ : 3.0 km <sup>2</sup>  | Number           | Area [km <sup>2</sup> ]<br>$\bar{a}$ : 7.2 km <sup>2</sup> |
| 0.05–0.1    | 117             | 8                                                           | 21                 | 1                                                           | 960              | 69                                                         |
| 0.1–0.5     | 392             | 90                                                          | 567                | 126                                                         | 3060             | 721                                                        |
| 0.5–1.0     | 122             | 88                                                          | 144                | 101                                                         | 1041             | 742                                                        |
| 1.0–5.0     | 409             | 1062                                                        | 192                | 442                                                         | 1832             | 4263                                                       |
| 5.0–10.0    | 186             | 1314                                                        | 50                 | 361                                                         | 449              | 3112                                                       |
| 10.0–50.0   | 299             | 7046                                                        | 72                 | 1495                                                        | 507              | 10 654                                                     |
| 50.0–100.0  | 76              | 5385                                                        | 8                  | 568                                                         | 83               | 5688                                                       |
| 100.0–500.0 | 56              | 10 725                                                      | 1                  | 143                                                         | 46               | 8907                                                       |
| > 500       | 4               | 9334                                                        | 0                  | 0                                                           | 15               | 24 293                                                     |
|             | 1661            | 35 052                                                      | 1055               | 3237                                                        | 7993             | 58 449                                                     |
|             | South-east      |                                                             | South-west         |                                                             | West             |                                                            |
|             | Number          | Area [km <sup>2</sup> ]<br>$\bar{a}$ : 4.0 km <sup>2</sup>  | Number             | Area [km <sup>2</sup> ]<br>$\bar{a}$ : 2.7 km <sup>2</sup>  | Number           | Area [km <sup>2</sup> ]<br>$\bar{a}$ : 2.2 km <sup>2</sup> |
| 0.05–0.1    | 596             | 42                                                          | 933                | 66                                                          | 483              | 34                                                         |
| 0.1–0.5     | 1115            | 258                                                         | 1356               | 308                                                         | 917              | 222                                                        |
| 0.5–1.0     | 344             | 243                                                         | 324                | 230                                                         | 351              | 252                                                        |
| 1.0–5.0     | 590             | 1286                                                        | 458                | 1044                                                        | 549              | 1268                                                       |
| 5.0–10.0    | 120             | 871                                                         | 88                 | 614                                                         | 158              | 1101                                                       |
| 10.0–50.0   | 121             | 2532                                                        | 72                 | 1595                                                        | 128              | 2478                                                       |
| 50.0–100.0  | 31              | 2090                                                        | 15                 | 1088                                                        | 7                | 455                                                        |
| 100.0–500.0 | 18              | 3133                                                        | 12                 | 2944                                                        | 1                | 135                                                        |
| > 500       | 2               | 1484                                                        | 2                  | 1173                                                        | 0                | 0                                                          |
|             | 2937            | 11 939                                                      | 3260               | 9062                                                        | 2594             | 5945                                                       |
|             | North-west      |                                                             | Marine Terminating |                                                             | Entire Greenland |                                                            |
|             | Number          | Area [km <sup>2</sup> ]<br>$\bar{a}$ : 8.3 km <sup>2</sup>  | Number             | Area [km <sup>2</sup> ]<br>$\bar{a}$ : 71.8 km <sup>2</sup> | Number           | Area [km <sup>2</sup> ]<br>$\bar{a}$ : 6.4 km <sup>2</sup> |
| 0.05–0.1    | 233             | 16                                                          | 2                  | 0,2                                                         | 3343             | 236                                                        |
| 0.1–0.5     | 270             | 57                                                          | 70                 | 19                                                          | 7677             | 1782                                                       |
| 0.5–1.0     | 54              | 37                                                          | 56                 | 41                                                          | 2380             | 1693                                                       |
| 1.0–5.0     | 86              | 211                                                         | 192                | 491                                                         | 4116             | 9576                                                       |
| 5.0–10.0    | 38              | 274                                                         | 122                | 873                                                         | 1089             | 7647                                                       |
| 10.0–50.0   | 52              | 1101                                                        | 287                | 6741                                                        | 1251             | 26 901                                                     |
| 50.0–100.0  | 11              | 794                                                         | 80                 | 5676                                                        | 231              | 16 068                                                     |
| 100.0–500.0 | 15              | 3356                                                        | 74                 | 16 044                                                      | 149              | 29 343                                                     |
| > 500       | 1               | 515                                                         | 21                 | 35 086                                                      | 24               | 36 799                                                     |
|             | 760             | 6361                                                        | 904                | 64 971.2                                                    | 20 260           | 130 045                                                    |

**Table S4.** Absolute area (in km<sup>2</sup>) covered by local GIC per aspect sector for all subregions and the whole of Greenland (CL0, CL1). The  $\pm 3.1\%$  uncertainty is not shown.

| Sector       | South-east | South-west | East   | West | North-west | North  | North-east | Entire Greenland |
|--------------|------------|------------|--------|------|------------|--------|------------|------------------|
| N            | 1196       | 1234       | 3209   | 774  | 699        | 4409   | 312        | 11 833           |
| NE           | 906        | 1393       | 3132   | 710  | 744        | 3800   | 340        | 11 025           |
| E            | 642        | 740        | 3285   | 679  | 613        | 3679   | 218        | 9856             |
| SE           | 567        | 804        | 4257   | 759  | 797        | 3206   | 531        | 10 921           |
| S            | 604        | 1648       | 3094   | 678  | 894        | 2700   | 495        | 10 113           |
| SW           | 672        | 1256       | 3110   | 805  | 161        | 3134   | 378        | 9516             |
| W            | 890        | 682        | 2808   | 662  | 266        | 11 241 | 385        | 16 934           |
| NW           | 1428       | 937        | 2749   | 627  | 162        | 2815   | 322        | 9040             |
| Total/sector | 6905       | 8694       | 25 644 | 5694 | 4336       | 34 984 | 2981       | 89 238           |

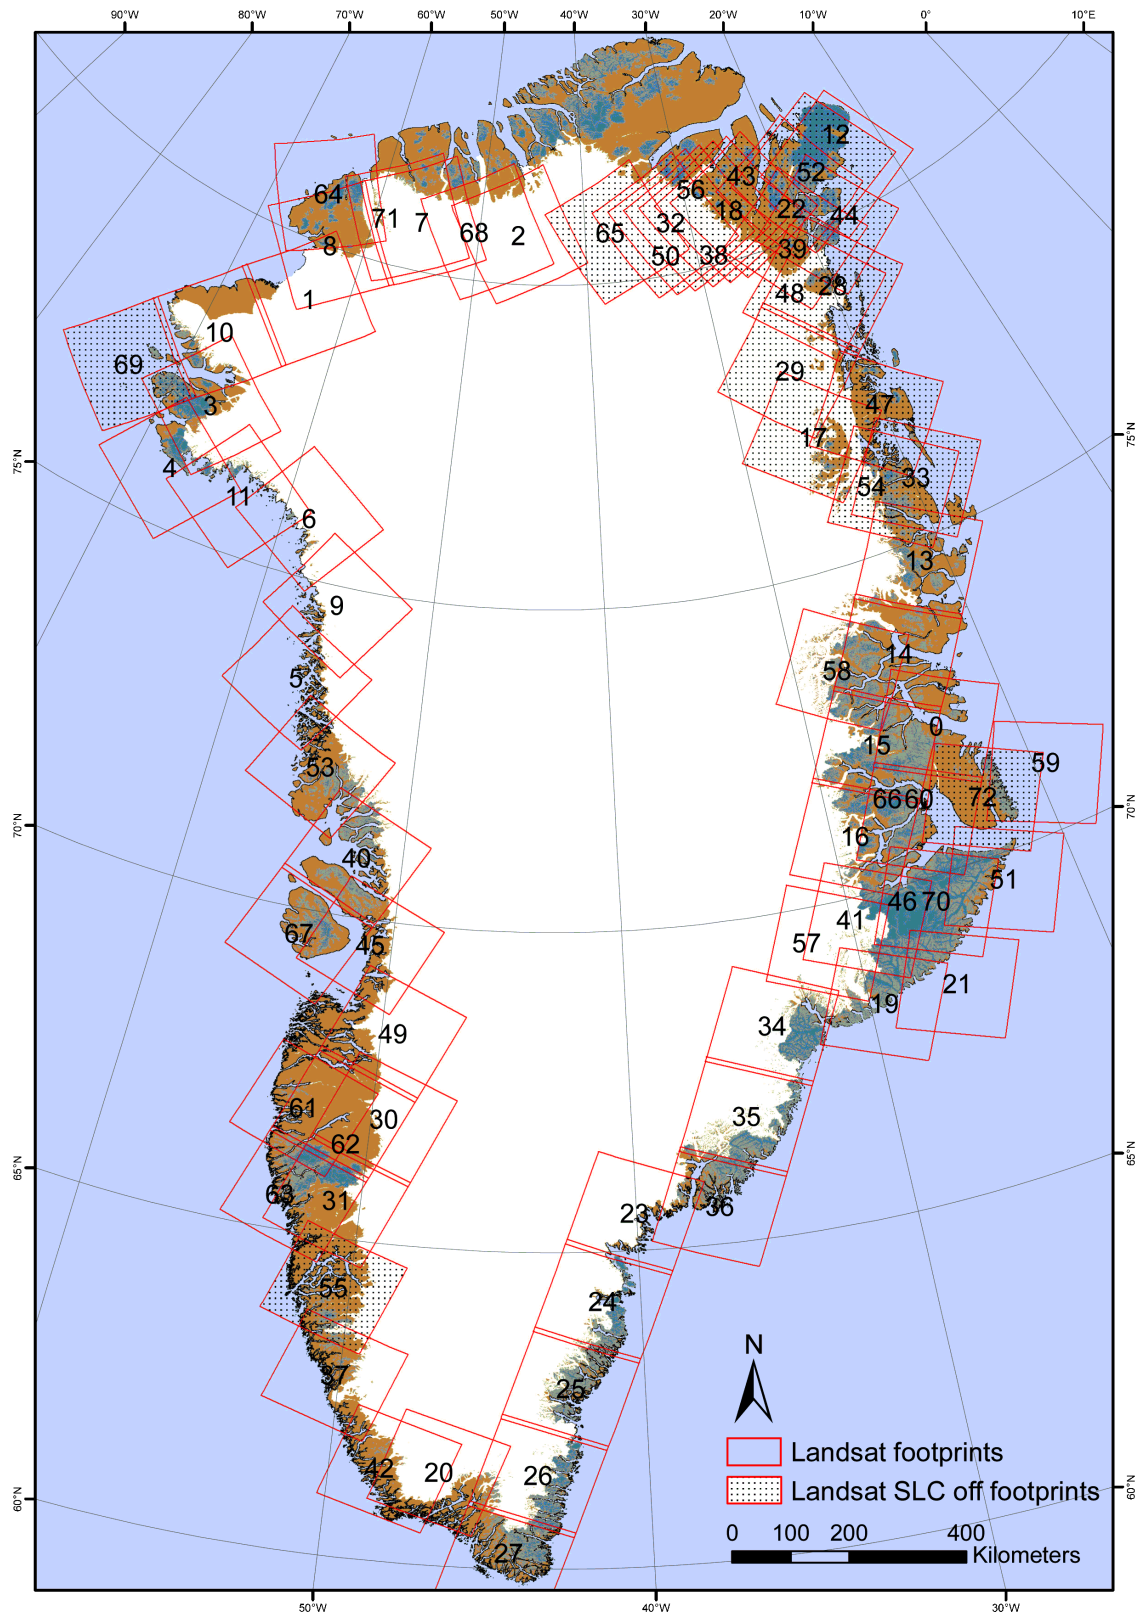

Fig. S1. Scene location (footprint) overview map (see Table S1 for path, row and acquisition date).

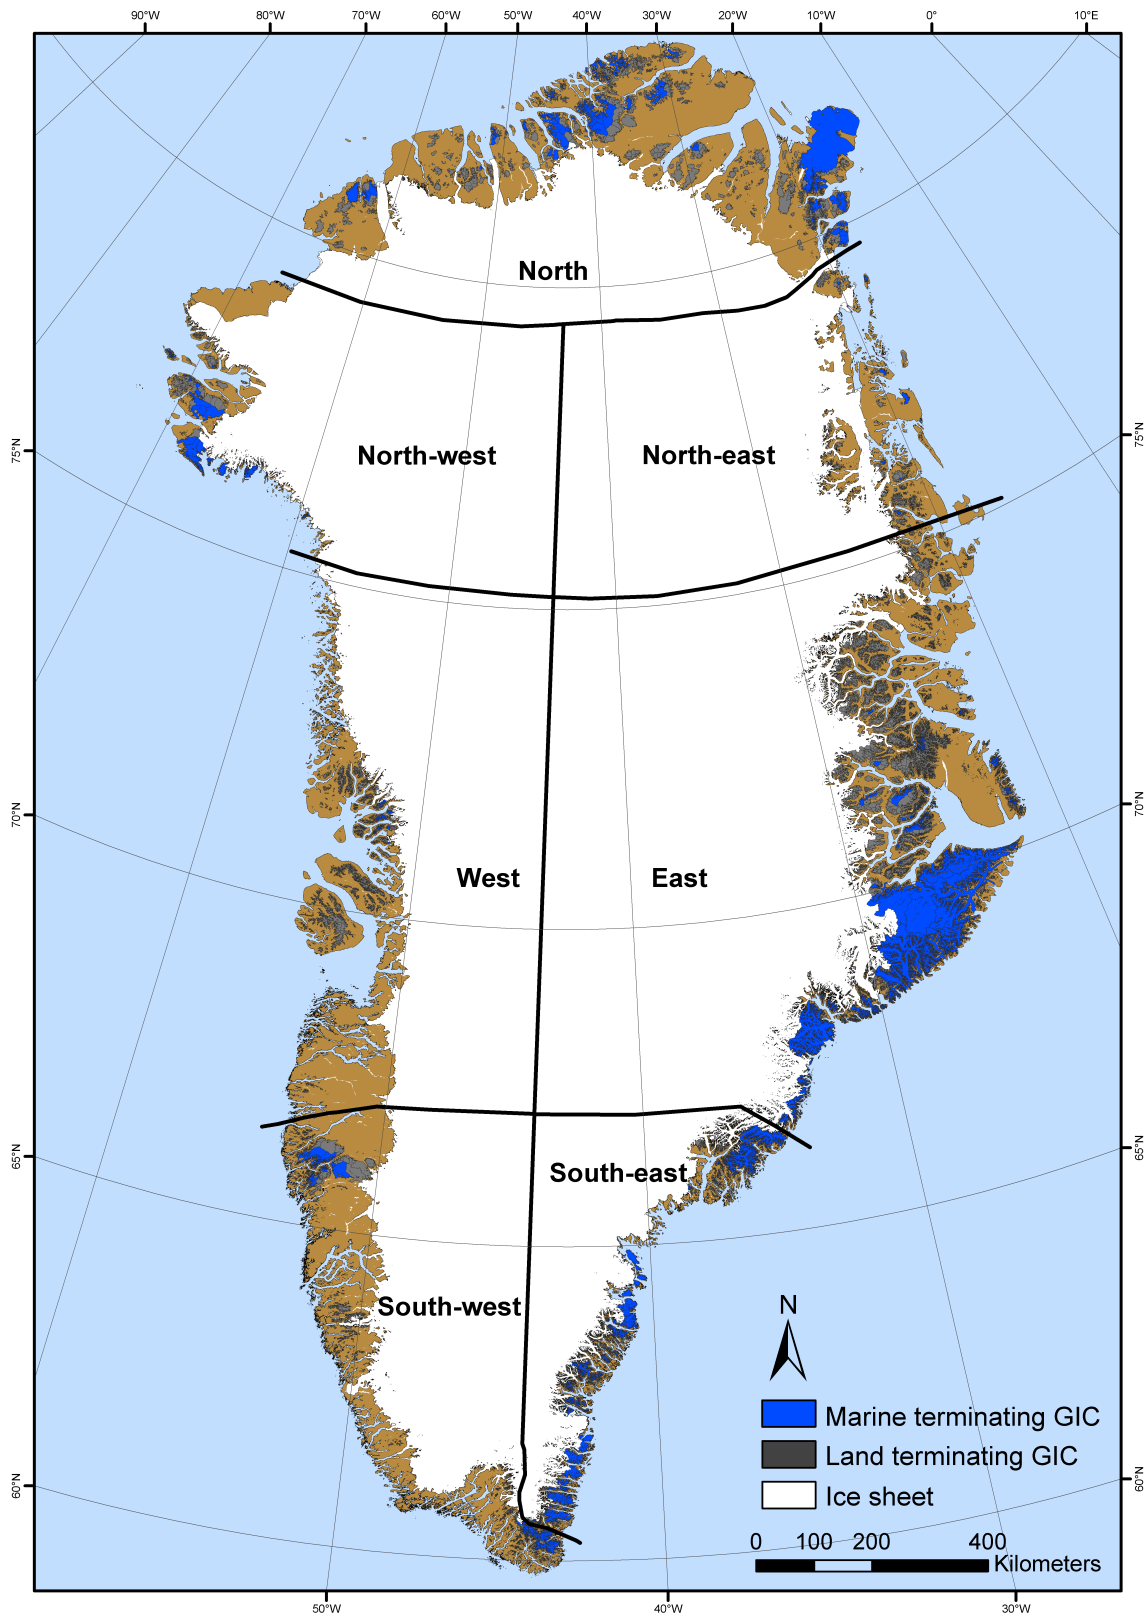

Fig. S2. Location map of all marine (blue) and land (grey) terminating glaciers in Greenland.
